# Supplementary material for: Meta-taxonomic analysis of prokaryotic and eukaryotic gut flora in stool samples from visceral leishmaniasis cases and endemic controls in Bihar State India
Source: PubMed Central journal article supplement (PMC6750594; doi:10.1371/journal.pntd.0007444), 2019-09-06
Supplement: pntd.0007444.s005.pdf [file pntd.0007444.s005.pdf]

# S1 Figure

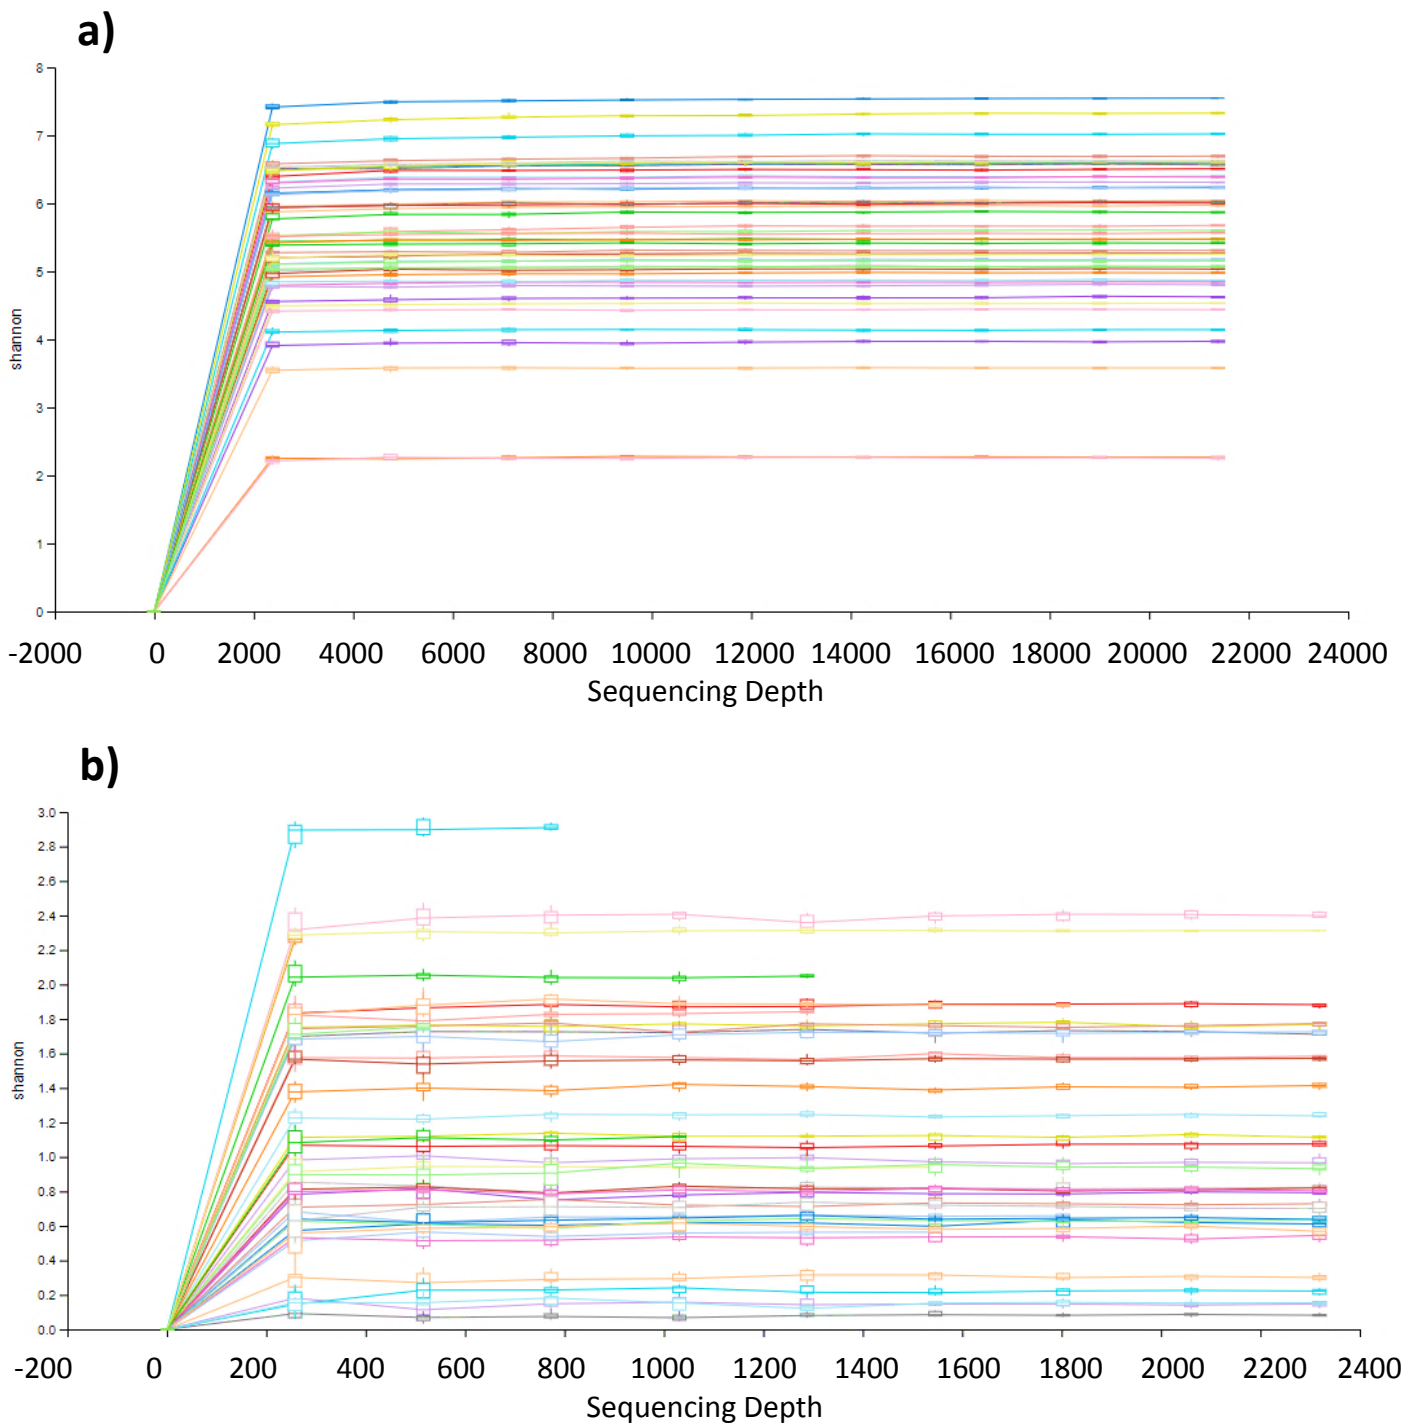

**S1 Figure.** Rarefaction plots based on Shannon's phylogenetic alpha diversity index for (a) 16S rRNA sequence data and (b) 18S rRNA sequence data (after filtering out contaminating bacterial sequences).
