# Supplementary material for: Meta-taxonomic analysis of prokaryotic and eukaryotic gut flora in stool samples from visceral leishmaniasis cases and endemic controls in Bihar State India
Source: PLoS Negl Trop Dis. 2019 Sep 6;13(9):e0007444. doi: 10.1371/journal.pntd.0007444 (PMC6750594; doi:10.1371/journal.pntd.0007444)
Supplement: S1 Table — (PDF) [file pntd.0007444.s002.pdf]

**S1 Table.** Metadata for endemic control (EC) and visceral leishmaniasis (VL) individuals contributing to the study.

| SampleID | Group | Sex | Age | Village                       | Block/PHC         | District        | Date Collect | Patient Type | Ascaris | Trichuris trichura | Hookworm | Hymenolepis | Pathogenic Helminth | >1 Pathogenic Helminth | Any Helminth | Filaria    |
|----------|-------|-----|-----|-------------------------------|-------------------|-----------------|--------------|--------------|---------|--------------------|----------|-------------|---------------------|------------------------|--------------|------------|
| EC1      | EC    | F   | 42  | Jagarnathpur Doghra           | SARAIYA           | Muzaffarpur     | 24-May-17    | Attendant EC | No      | No                 | No       | No          | No                  | No                     | No           | Negative   |
| EC2      | EC    | F   | 7   | Khajuri                       | SAHEBGANJ         | Muzaffarpur     | 29-May-17    | Field EC     | No      | No                 | No       | Yes         | No                  | No                     | Yes          | Not tested |
| EC3      | EC    | F   | 11  | Khajuri                       | SAHEBGANJ         | Muzaffarpur     | 29-May-17    | Field EC     | Yes     | No                 | No       | No          | Yes                 | No                     | Yes          | Not tested |
| EC4      | EC    | M   | 20  | Kerma                         | KURHANI           | Muzaffarpur     | 24-May-17    | Attendant EC | No      | No                 | Yes      | No          | Yes                 | No                     | Yes          | Negative   |
| EC5      | EC    | F   | 40  | Shahwajpur                    | KANTI             | Muzaffarpur     | 24-May-17    | Attendant EC | No      | Yes                | Yes      | No          | Yes                 | Yes                    | Yes          | Positive   |
| EC6      | EC    | F   | 40  | Hiramma                       | TARIYANI          | Sheohar         | 23-May-17    | Attendant EC | Yes     | Yes                | No       | No          | Yes                 | Yes                    | Yes          | Positive   |
| EC7      | EC    | F   | 40  | Rajwara                       | MUSHAHARI         | Muzaffarpur     | 05-Oct-17    | Attendant EC | NA      | NA                 | NA       | NA          | NA                  | NA                     | NA           | Not tested |
| EC8      | EC    | F   | 30  | Andaul Urf BishunpurMandal    | BARURAJ (MOTIPUR) | Muzaffarpur     | 18-May-17    | Attendant EC | No      | Yes                | No       | No          | Yes                 | No                     | Yes          | Negative   |
| EC9      | EC    | F   | 42  | Ghosaut                       | MINAPUR           | Muzaffarpur     | 06-May-17    | Attendant EC | No      | No                 | No       | No          | No                  | No                     | No           | Not tested |
| EC10     | EC    | F   | 35  | Dumri Parmanandpur            | BOCHAHA           | Muzaffarpur     | 08-May-17    | Attendant EC | No      | No                 | Yes      | No          | Yes                 | No                     | Yes          | Not tested |
| EC11     | EC    | M   | 18  | Khajuri                       | SAHEBGANJ         | Muzaffarpur     | 29-May-17    | Field EC     | No      | No                 | No       | No          | No                  | No                     | No           | Not tested |
| EC12     | EC    | F   | 45  | Bajar Munria                  | MINAPUR           | Muzaffarpur     | 25-May-17    | Attendant EC | No      | No                 | No       | No          | No                  | No                     | No           | Negative   |
| EC13     | EC    | F   | 40  | Chhitri                       | SARAIYA           | Muzaffarpur     | 04-Oct-17    | Attendant EC | NA      | NA                 | NA       | NA          | NA                  | NA                     | NA           | Not tested |
| EC14     | EC    | M   | 19  | Sahila Rampur                 | BOCHAHA           | Muzaffarpur     | 26-May-17    | Attendant EC | No      | No                 | No       | No          | No                  | No                     | No           | Negative   |
| EC15     | EC    | M   | 25  | Mahesha Farrukhpur            | RUNNI SAIDPUR     | Sitamarhi       | 16-May-17    | Attendant EC | No      | No                 | No       | No          | No                  | No                     | No           | Negative   |
| EC16     | EC    | F   | 35  | Kamla Balia                   | BOCHAHA           | Muzaffarpur     | 07-Oct-17    | Attendant EC | NA      | NA                 | NA       | NA          | NA                  | NA                     | NA           | Not tested |
| EC17     | EC    | F   | 47  | Makundpur                     | TARAIYA           | Saran           | 10-May-17    | Attendant EC | Yes     | No                 | Yes      | No          | Yes                 | Yes                    | Yes          | Not tested |
| EC18     | EC    | M   | 13  | Khajuri                       | SAHEBGANJ         | Muzaffarpur     | 29-May-17    | Field EC     | No      | No                 | No       | Yes         | No                  | No                     | Yes          | Not tested |
| EC19     | EC    | F   | 12  | Khajuri                       | SAHEBGANJ         | Muzaffarpur     | 29-May-17    | Field EC     | No      | No                 | No       | No          | No                  | No                     | No           | Not tested |
| EC20     | EC    | M   | 14  | Khajuri                       | SAHEBGANJ         | Muzaffarpur     | 29-May-17    | Field EC     | No      | No                 | No       | Yes         | No                  | No                     | Yes          | Not tested |
| EC21     | EC    | F   | 30  | Singwari                      | KATRA             | Muzaffarpur     | 06-May-17    | Attendant EC | No      | No                 | No       | No          | No                  | No                     | No           | Negative   |
| EC22     | EC    | F   | 12  | Khajuri                       | SAHEBGANJ         | Muzaffarpur     | 29-May-17    | Field EC     | No      | No                 | No       | Yes         | No                  | No                     | Yes          | Not tested |
| EC23     | EC    | F   | 40  | Kenaru                        | KURHANI           | Muzaffarpur     | 08-May-17    | Attendant EC | No      | No                 | No       | No          | No                  | No                     | No           | Not tested |
| VL1      | VL    | M   | 20  | Jagarnathpur Doghra           | SARAIYA           | Muzaffarpur     | 26-May-17    | VL           | No      | No                 | No       | No          | No                  | No                     | No           | Negative   |
| VL2      | VL    | F   | 36  | Sahila Rampur                 | BOCHAHA           | Muzaffarpur     | 26-May-17    | VL           | No      | No                 | No       | No          | No                  | No                     | No           | Negative   |
| VL3      | VL    | F   | 55  | Madhopur Hazari               | SAHEBGANJ         | Muzaffarpur     | 31-May-17    | VL           | No      | No                 | No       | No          | No                  | No                     | No           | Positive   |
| VL4      | VL    | F   | 9   | Singwari                      | KATRA             | Muzaffarpur     | 07-May-17    | VL           | No      | No                 | No       | No          | No                  | No                     | No           | Negative   |
| VL5      | VL    | F   | 20  | Shahbazzpur                   | KANTI             | Muzaffarpur     | 24-May-17    | VL           | No      | Yes                | Yes      | No          | Yes                 | Yes                    | Yes          | Positive   |
| VL6      | VL    | F   | 16  | Madhopur                      | MADHUBAN          | Purba Champaran | 31-May-17    | VL           | No      | No                 | Yes      | No          | Yes                 | No                     | Yes          | Positive   |
| VL7      | VL    | F   | 27  | NA                            |                   | NA              | 11-Oct-17    | VL           | NA      | NA                 | NA       | NA          | NA                  | NA                     | NA           | NA         |
| VL8      | VL    | F   | 40  | Kerma                         | KURHANI           | Muzaffarpur     | 24-May-17    | VL           | No      | No                 | No       | No          | No                  | No                     | No           | Positive   |
| VL9      | VL    | M   | 5   | Madhopur                      | SAHEBGANJ         | Muzaffarpur     | 31-May-17    | VL           | No      | Yes                | No       | No          | Yes                 | No                     | Yes          | Negative   |
| VL10     | VL    | M   | 10  | Kamla Balia                   | BOCHAHA           | Muzaffarpur     | 07-Oct-17    | VL           | NA      | NA                 | NA       | NA          | NA                  | NA                     | NA           | NA         |
| VL11     | VL    | M   | 15  | Hiramma                       | TARIYANI          | Sheohar         | 23-May-17    | VL           | No      | Yes                | No       | No          | Yes                 | No                     | Yes          | Negative   |
| VL12     | VL    | F   | 25  | Mohanpur                      | KURHANI           | Muzaffarpur     | 04-Jun-17    | VL           | No      | No                 | No       | No          | No                  | No                     | No           | NA         |
| VL13     | VL    | F   | 5   | Basant Kharauna               | KURHANI           | Muzaffarpur     | 07-Oct-17    | VL           | NA      | NA                 | NA       | NA          | NA                  | NA                     | NA           | NA         |
| VL14     | VL    | F   | 10  | Bajar Munria                  | MINAPUR           | Muzaffarpur     | 25-May-17    | VL           | No      | No                 | Yes      | No          | Yes                 | No                     | Yes          | Negative   |
| VL15     | VL    | F   | 12  | Mithepur Bin Toli             | GARKHA            | Saran           | 08-Oct-17    | VL           | NA      | NA                 | NA       | NA          | NA                  | NA                     | NA           | NA         |
| VL16     | VL    | F   | 8   | Andaul Urf BishunpurMandal    | BARURAJ (MOTIPUR) | Muzaffarpur     | 18-May-17    | VL           | No      | Yes                | No       | No          | Yes                 | No                     | Yes          | Positive   |
| VL17     | VL    | F   | 40  | Bishunpur Urf Bishunpur Anant | RUNNI SAIDPUR     | Sitamarhi       | 31-May-17    | VL           | No      | Yes                | No       | No          | Yes                 | No                     | Yes          | NA         |
| VL18     | VL    | F   | 13  | Chhitri                       | SARAIYA           | Muzaffarpur     | 04-Oct-17    | VL           | NA      | NA                 | NA       | NA          | NA                  | NA                     | NA           | NA         |
| VL19     | VL    | M   | 10  | Rajwara                       | MUSHAHARI         | Muzaffarpur     | 05-Oct-17    | VL           | NA      | NA                 | NA       | NA          | NA                  | NA                     | NA           | NA         |
| VL20     | VL    | F   | 17  | Gausara                       | KURHANI           | Muzaffarpur     | 31-May-17    | VL           | No      | No                 | No       | No          | No                  | No                     | No           | Negative   |
| VL21     | VL    | M   | 50  | Ghosaut                       | MINAPUR           | Muzaffarpur     | 05-May-17    | VL           | No      | No                 | No       | No          | No                  | No                     | No           | NA         |
| VL22     | VL    | M   | 7   | Madhopur Hazari               | SAHEBGANJ         | Muzaffarpur     | 31-May-17    | VL           | No      | No                 | No       | No          | No                  | No                     | No           | Positive   |
| VL23     | VL    | F   | 45  | MANIKPUR                      | SARAIYA           | Muzaffarpur     | 17-Oct-17    | VL           | NA      | NA                 | NA       | NA          | NA                  | NA                     | NA           | NA         |
