# Supplementary material for: Meta-taxonomic analysis of prokaryotic and eukaryotic gut flora in stool samples from visceral leishmaniasis cases and endemic controls in Bihar State India
Source: PLoS Negl Trop Dis. 2019 Sep 6;13(9):e0007444. doi: 10.1371/journal.pntd.0007444 (PMC6750594; doi:10.1371/journal.pntd.0007444)
Supplement: S3 Table — (XLSX) [file pntd.0007444.s004.xlsx]

## Sheet: 18S_raw_counts_filtered_genus
S3 Table. Genus-level raw counts for 18S rRNA analysis after filtering out a small number of human 18S rRNA sequences and the cross-contaminating bacterial 16S.
sample	D_0__Eukaryota;D_1__Amoebozoa;D_2__Archamoebae;D_3__Entamoebida;D_4__Entamoeba;__	D_0__Eukaryota;D_1__Amoebozoa;D_2__Discosea;D_3__Flabellinia;D_4__Vannellida;D_5__Protosteliopsis	D_0__Eukaryota;D_1__Amoebozoa;D_2__Gracilipodida;D_3__Flamella;D_4__Macrotyloma uniflorum;D_5__Macrotyloma uniflorum	D_0__Eukaryota;D_1__Archaeplastida;D_2__Chloroplastida;D_3__Charophyta;D_10__Apiales;Ambiguous_taxa	D_0__Eukaryota;D_1__Archaeplastida;D_2__Chloroplastida;D_3__Charophyta;D_10__Brassicales;D_11__Brassica	D_0__Eukaryota;D_1__Archaeplastida;D_2__Chloroplastida;D_3__Charophyta;D_10__Caryophyllales;__	D_0__Eukaryota;D_1__Archaeplastida;D_2__Chloroplastida;D_3__Charophyta;D_10__Cucurbitales;D_11__Cucumis	D_0__Eukaryota;D_1__Archaeplastida;D_2__Chloroplastida;D_3__Charophyta;D_10__Fabales;Ambiguous_taxa	D_0__Eukaryota;D_1__Archaeplastida;D_2__Chloroplastida;D_3__Charophyta;D_10__Fabales;D_11__Arachis	D_0__Eukaryota;D_1__Archaeplastida;D_2__Chloroplastida;D_3__Charophyta;D_10__Fabales;D_11__Cicer	D_0__Eukaryota;D_1__Archaeplastida;D_2__Chloroplastida;D_3__Charophyta;D_10__Fabales;__	D_0__Eukaryota;D_1__Archaeplastida;D_2__Chloroplastida;D_3__Charophyta;D_10__Lamiales;Ambiguous_taxa	D_0__Eukaryota;D_1__Archaeplastida;D_2__Chloroplastida;D_3__Charophyta;D_10__Myrtales;D_11__Punica	D_0__Eukaryota;D_1__Archaeplastida;D_2__Chloroplastida;D_3__Charophyta;D_10__Rosales;D_11__Pyrus	D_0__Eukaryota;D_1__Archaeplastida;D_2__Chloroplastida;D_3__Charophyta;D_10__Sapindales;D_11__Citrus	D_0__Eukaryota;D_1__Archaeplastida;D_2__Chloroplastida;D_3__Charophyta;D_10__Solanales;D_11__Ipomoea	D_0__Eukaryota;D_1__Archaeplastida;D_2__Chloroplastida;D_3__Charophyta;D_10__Solanales;D_11__Nicotiana	D_0__Eukaryota;D_1__Archaeplastida;D_2__Chloroplastida;D_3__Charophyta;D_10__Solanales;__	D_0__Eukaryota;D_1__Archaeplastida;D_2__Chloroplastida;D_3__Charophyta;D_11__Asparagales;D_12__Allium	D_0__Eukaryota;D_1__Archaeplastida;D_2__Chloroplastida;D_3__Charophyta;D_11__Incertae Sedis;Ambiguous_taxa	D_0__Eukaryota;D_1__Archaeplastida;D_2__Chloroplastida;D_3__Charophyta;D_11__Poales;D_12__Triticum	D_0__Eukaryota;D_1__Archaeplastida;D_2__Chloroplastida;D_3__Charophyta;D_11__Poales;__	D_0__Eukaryota;D_1__Archaeplastida;D_2__Chloroplastida;D_3__Charophyta;D_11__Zingiberales;D_12__Musa	D_0__Eukaryota;D_1__Archaeplastida;D_2__Chloroplastida;D_3__Charophyta;D_8__Spermatophyta;D_9__Pinophyta	D_0__Eukaryota;D_1__Archaeplastida;D_2__Chloroplastida;D_3__Charophyta;__;__	D_0__Eukaryota;D_1__Excavata;D_2__Discoba;D_3__Discicristata;D_7__Parabodonida;D_8__Parabodo	D_0__Eukaryota;D_1__Excavata;D_2__Discoba;D_3__Discicristata;D_7__Trypanosomatida;D_8__Leishmania	D_0__Eukaryota;D_1__Excavata;D_2__Metamonada;D_3__Parabasalia;D_4__Trichomonadea;D_5__Pentatrichomonas	D_0__Eukaryota;D_1__Excavata;D_2__Metamonada;D_3__Parabasalia;D_4__Tritrichomonadea;D_5__Dientamoeba	D_0__Eukaryota;D_1__Opisthokonta;D_2__Holozoa;D_3__Metazoa (Animalia);D_10__Neoptera;D_11__Coleoptera	D_0__Eukaryota;D_1__Opisthokonta;D_2__Holozoa;D_3__Metazoa (Animalia);D_7__Chromadorea;D_8__Ascaridida	D_0__Eukaryota;D_1__Opisthokonta;D_2__Holozoa;D_3__Metazoa (Animalia);D_7__Chromadorea;D_8__Rhabditida	D_0__Eukaryota;D_1__Opisthokonta;D_2__Holozoa;D_3__Metazoa (Animalia);D_7__Chromadorea;__	D_0__Eukaryota;D_1__Opisthokonta;D_2__Holozoa;D_3__Metazoa (Animalia);D_8__Dorylaimia;D_9__Trichocephalida	D_0__Eukaryota;D_1__Opisthokonta;D_2__Holozoa;D_3__Metazoa (Animalia);D_8__Eucestoda;D_9__Cyclophyllidea	D_0__Eukaryota;D_1__Opisthokonta;D_2__Holozoa;D_3__Metazoa (Animalia);__;__	D_0__Eukaryota;D_1__Opisthokonta;D_2__Nucletmycea;D_3__Fungi;D_8__Pleosporales;Ambiguous_taxa	D_0__Eukaryota;D_1__Opisthokonta;D_2__Nucletmycea;D_3__Fungi;D_8__Rhizopodaceae;D_9__Rhizopus	D_0__Eukaryota;D_1__Opisthokonta;D_2__Nucletmycea;D_3__Fungi;D_9__Agaricostilbaceae;D_10__Sterigmatomyces	D_0__Eukaryota;D_1__Opisthokonta;D_2__Nucletmycea;D_3__Fungi;D_9__Aspergillaceae;D_10__Aspergillus	D_0__Eukaryota;D_1__Opisthokonta;D_2__Nucletmycea;D_3__Fungi;D_9__Aspergillaceae;__	D_0__Eukaryota;D_1__Opisthokonta;D_2__Nucletmycea;D_3__Fungi;D_9__Ceratobasidiaceae;D_10__Rhizoctonia	D_0__Eukaryota;D_1__Opisthokonta;D_2__Nucletmycea;D_3__Fungi;D_9__Debaryomycetaceae;D_10__Candida-Lodderomyces clade	D_0__Eukaryota;D_1__Opisthokonta;D_2__Nucletmycea;D_3__Fungi;D_9__Incertae Sedis;D_10__Starmerella-Candida clade	D_0__Eukaryota;D_1__Opisthokonta;D_2__Nucletmycea;D_3__Fungi;D_9__Metschnikowiaceae;D_10__Kodamaea	D_0__Eukaryota;D_1__Opisthokonta;D_2__Nucletmycea;D_3__Fungi;D_9__Pichiaceae;D_10__Pichia	D_0__Eukaryota;D_1__Opisthokonta;D_2__Nucletmycea;D_3__Fungi;D_9__Pleosporaceae;Ambiguous_taxa	D_0__Eukaryota;D_1__Opisthokonta;D_2__Nucletmycea;D_3__Fungi;D_9__Saccharomycetaceae;D_10__Lachancea	D_0__Eukaryota;D_1__Opisthokonta;D_2__Nucletmycea;D_3__Fungi;D_9__Saccharomycetaceae;D_10__Nakaseomyces-Candida clade
EC1	0	0	0	20	0	0	0	0	0	0	232	0	0	0	473	0	0	0	0	0	0	18	0	0	0	0	0	0	9163	0	0	0	0	0	0	0	15	0	0	0	0	0	0	0	0	3	0	0	0
EC10	42	0	0	0	0	0	0	0	0	0	0	0	0	0	0	0	30	0	0	0	0	0	0	0	0	0	0	0	0	0	0	115	0	0	0	0	0	0	0	0	0	0	0	0	0	0	0	0	0
EC11	0	0	0	0	0	124	0	0	0	0	0	0	0	0	0	0	0	0	0	0	0	110	0	0	0	13	0	0	0	0	0	0	0	0	0	0	0	0	0	0	0	17	12	0	0	0	0	0	183
EC12	169	0	0	0	0	0	0	0	0	0	34	0	0	0	0	0	0	0	0	0	0	0	0	0	0	0	0	413	0	0	0	0	0	0	0	0	0	0	0	2	0	0	0	0	0	0	0	0	0
EC13	0	0	0	43	0	14	0	0	0	0	26	0	42	0	0	0	0	0	65	0	0	17	16	0	0	0	0	0	0	0	0	0	0	0	0	0	0	0	0	0	0	0	0	0	0	0	0	0	0
EC14	0	0	0	30	0	0	0	0	0	0	85	4059	0	0	0	0	0	0	0	0	2	47	0	0	0	0	0	0	0	0	0	0	0	0	0	0	0	0	0	0	0	0	0	0	0	2	0	0	0
EC15	513	0	0	8	0	0	0	0	0	0	0	0	0	0	0	0	13	0	0	0	0	0	0	0	78	0	0	0	0	0	0	0	0	0	0	0	0	0	0	0	3	0	0	0	0	0	0	0	0
EC16	116	0	0	0	0	0	0	0	0	0	0	0	0	0	0	0	0	0	0	0	0	6	0	0	0	0	0	24	8032	0	10	0	0	0	0	0	0	0	0	0	0	0	0	0	0	0	0	0	0
EC17	0	0	0	0	0	0	0	0	0	0	0	0	0	0	0	74	0	0	0	0	0	0	0	0	0	0	0	0	0	0	2558	333	0	0	0	0	0	0	0	0	0	0	0	0	0	0	0	0	0
EC18	3501	0	0	0	0	0	0	14	0	0	0	0	0	0	97	0	0	0	7	0	0	0	0	0	0	0	0	0	0	0	0	0	0	0	173	0	0	0	0	0	0	0	0	0	0	0	0	0	0
EC19	0	0	0	113	0	0	0	1279	0	0	0	0	0	0	0	0	0	0	0	1486	0	102	0	0	9	0	0	0	0	0	0	0	0	0	0	0	0	0	0	0	0	0	0	0	0	0	0	0	0
EC2	0	0	0	0	0	0	0	18	0	0	0	27	0	0	0	0	0	0	0	0	0	33	0	0	0	0	0	1491	0	0	0	0	0	0	7	0	0	0	0	0	0	0	0	0	0	0	0	0	0
EC20	0	0	0	0	0	0	0	8480	0	0	7	0	0	0	381	0	0	0	0	0	0	43	0	0	276	0	0	0	0	0	0	0	0	0	5	0	0	0	0	0	0	0	0	0	0	0	0	0	0
EC21	0	0	5	287	0	0	0	22	0	0	115	0	0	0	0	0	1848	489	0	0	0	81	0	0	14	0	0	94	0	0	0	0	0	0	0	0	0	0	0	22	0	0	0	0	0	301	0	0	0
EC22	2	0	0	167	126	0	0	0	0	0	41	60	0	0	0	0	0	0	0	0	4	2131	0	0	0	0	0	0	0	0	0	0	0	0	432	0	0	0	0	0	0	0	0	123	0	0	0	0	0
EC23	3443	0	0	0	0	0	0	0	0	0	0	18	0	0	0	0	0	0	0	0	0	0	0	0	0	0	0	0	5	0	0	0	0	0	0	0	0	0	0	0	0	0	0	0	0	0	0	0	0
EC3	2012	0	0	0	0	0	0	41	0	0	0	0	0	0	0	0	0	0	0	0	0	0	0	0	0	0	0	74	7018	0	5	0	0	0	0	0	0	0	0	0	0	0	0	0	0	0	0	0	0
EC4	0	0	0	0	0	0	0	0	0	0	0	0	0	0	0	0	0	0	0	0	3	1276	0	0	66	0	0	0	0	0	0	274	0	0	0	0	0	0	0	0	0	0	0	0	0	0	0	0	0
EC5	21	0	0	16	0	0	0	0	0	0	0	71	0	0	0	0	0	0	0	0	0	9	0	0	49	0	0	0	126	0	0	269	0	0	0	0	0	0	0	0	0	0	0	0	0	0	0	0	0
EC6	0	0	0	0	0	0	226	0	0	7	2781	0	0	0	0	0	0	0	0	0	0	0	0	0	0	0	0	0	0	0	9	0	0	0	0	0	0	0	0	0	0	0	0	0	0	0	0	0	0
EC7	23	0	0	0	0	0	0	0	0	0	0	0	0	0	0	0	0	0	0	0	0	0	0	0	51	0	0	4	0	0	0	128	0	0	0	0	0	0	0	0	0	0	0	0	0	0	0	0	0
EC8	0	0	0	0	0	0	0	0	0	0	0	24	0	0	0	0	0	0	0	0	0	0	0	0	148	0	0	0	0	0	0	0	0	0	0	0	0	0	0	0	0	0	0	0	0	0	0	0	0
EC9	0	0	0	0	0	0	0	0	0	0	19	0	5	0	0	0	0	0	0	0	0	20	0	0	0	0	0	0	0	0	0	0	0	0	0	0	0	0	0	0	0	0	0	0	0	0	0	0	0
VL1	0	0	0	0	0	0	361	0	0	0	0	0	0	0	0	0	33	0	0	0	0	152	0	0	0	0	0	0	2	0	0	0	0	0	0	0	0	0	0	0	0	0	0	0	0	0	0	0	0
VL10	0	0	0	0	0	0	0	87	0	0	0	43	0	0	0	0	0	0	0	0	0	0	0	32	0	0	0	611	399	3	0	0	195	0	0	0	0	0	8	0	0	0	0	0	0	0	0	0	0
VL11	1235	0	0	0	0	0	0	0	0	0	2117	0	0	0	0	0	0	0	0	0	0	0	0	0	0	0	0	5	0	0	0	0	0	0	0	0	0	0	0	0	0	0	5	0	0	0	0	0	7
VL12	0	0	0	0	0	0	0	0	0	0	206	0	0	0	0	0	0	0	0	0	0	19	0	0	37	0	0	2359	0	0	0	0	0	3	0	11	0	0	0	0	0	0	0	0	0	0	0	0	0
VL13	0	0	0	0	0	0	0	0	0	0	75	263	28	0	863	0	96	0	0	0	0	0	0	0	43	0	0	0	0	0	0	0	0	0	0	0	0	5	0	0	0	2	4	9	2	0	0	15	0
VL14	0	0	0	0	0	0	0	0	0	0	9	0	0	0	0	0	0	0	0	0	0	37	0	0	0	0	12	0	0	0	0	21	0	0	0	0	0	0	0	0	0	0	0	0	0	0	0	0	0
VL15	0	0	0	0	0	0	0	0	0	0	0	47	0	0	0	0	0	0	0	0	0	118	0	0	0	0	0	0	10048	0	0	0	0	0	0	0	0	0	0	0	0	0	0	0	0	0	0	0	0
VL16	0	0	0	0	0	0	0	0	0	0	0	0	6	0	0	0	0	0	0	0	0	0	0	0	0	0	0	6557	0	0	0	0	0	0	0	0	0	0	0	0	0	0	0	0	0	0	0	0	0
VL17	0	0	0	0	0	0	0	0	0	0	0	0	0	0	0	0	0	0	0	0	0	16	0	0	18	0	0	333	0	0	0	262	0	0	0	0	0	0	0	0	0	0	0	0	0	10	0	0	0
VL18	0	0	0	0	0	0	0	0	0	0	0	0	0	16	0	0	0	0	0	0	0	0	0	0	0	0	0	0	4967	0	0	0	0	0	0	0	0	0	0	0	0	0	0	0	0	0	0	0	0
VL19	0	0	0	0	0	0	0	0	0	0	41	95	6	0	0	0	0	0	0	0	0	0	0	2	0	0	0	0	0	0	0	0	0	0	0	0	0	0	0	0	0	0	31	0	0	0	0	0	0
VL2	0	0	0	0	0	0	0	0	0	0	0	0	0	0	0	0	70	0	0	0	0	0	0	0	0	0	0	0	0	0	0	0	0	0	0	0	0	0	0	0	0	0	0	0	0	0	0	0	0
VL20	41	0	0	0	0	0	0	67	0	0	0	513	15	0	0	0	0	0	0	0	0	8	0	0	0	0	0	567	236	0	0	0	0	0	0	0	0	0	0	0	0	0	0	0	0	0	0	0	0
VL21	252	0	0	0	0	0	0	47	0	0	0	0	0	0	0	0	0	0	0	0	0	0	0	0	0	0	0	0	0	0	0	0	0	0	0	0	0	0	0	0	0	0	0	0	0	0	0	0	0
VL22	0	0	0	0	0	0	0	0	627	0	0	0	724	324	187	0	0	0	0	0	0	0	0	0	398	0	0	0	0	0	0	0	0	0	0	0	0	0	0	4	0	0	0	0	0	3	0	0	0
VL23	0	0	0	0	0	0	0	0	0	0	0	0	96	0	0	0	0	0	0	0	0	0	15	0	0	0	0	5039	0	0	0	23	0	0	0	0	0	0	0	0	0	0	0	0	0	0	3	0	0
VL3	0	0	0	0	0	0	0	0	0	0	155	0	0	0	0	0	0	0	0	0	3	111	0	0	0	0	0	14333	0	0	0	0	0	0	0	0	0	0	0	0	0	0	0	0	0	0	0	0	0
VL4	0	0	0	0	0	0	0	0	0	0	0	0	87	0	0	0	0	0	0	0	0	0	0	0	0	0	0	0	0	0	0	0	24	0	0	0	0	0	0	0	0	0	0	0	0	0	0	0	0
VL5	4	20	0	0	0	0	0	0	0	0	0	88	0	0	0	0	0	0	0	0	0	0	0	0	261	0	0	1426	17	0	0	1105	0	0	0	0	0	0	0	0	0	0	3	0	0	0	0	0	0
VL6	0	0	0	0	0	0	1790	0	0	0	0	1631	0	0	0	0	0	0	0	0	0	17	0	0	130	0	0	0	0	0	0	25	0	0	0	0	0	0	0	0	0	0	0	0	0	0	0	0	0
VL7	0	0	0	340	0	0	0	0	0	0	1067	0	0	0	0	0	12	0	0	0	2	331	0	0	35	9	0	0	0	0	0	0	0	0	0	0	0	0	0	6	0	0	87	0	0	0	0	0	0
VL8	0	0	0	24	0	0	0	0	0	0	0	0	0	0	807	0	0	0	0	0	0	348	0	0	7	0	0	0	5	0	0	0	0	0	0	0	0	0	0	0	0	0	0	0	0	0	0	0	0
VL9	0	0	0	17	0	0	0	0	0	0	19	0	0	0	0	0	0	0	0	0	0	423	0	0	0	0	0	127	0	0	0	0	0	0	0	0	0	0	0	0	0	0	6	3	0	0	0	0	0
[truncated: 14 more columns]
